# Supplementary material for: Inhibition of the NLRP3-inflammasome as a potential approach for neuroprotection after stroke
Source: PubMed Central journal article supplement (PMC5899150; doi:10.1038/s41598-018-24350-x), 2018-04-13
Supplement: 41598_2018_24350_MOESM1_ESM.pdf [file 41598_2018_24350_MOESM1_ESM.pdf]

# Inhibition of the NLRP3-inflammasome as a potential approach for neuroprotection after stroke

Saifudeen Ismael,<sup>1</sup> Liang Zhao,<sup>1</sup> Sanaz Nasoohi,<sup>1,2</sup> Tauheed Ishrat<sup>1,3\*</sup>

## Effect of MCC950 on Cleaved IL-18 and IL-1 $\beta$ at 24 h after MCAO

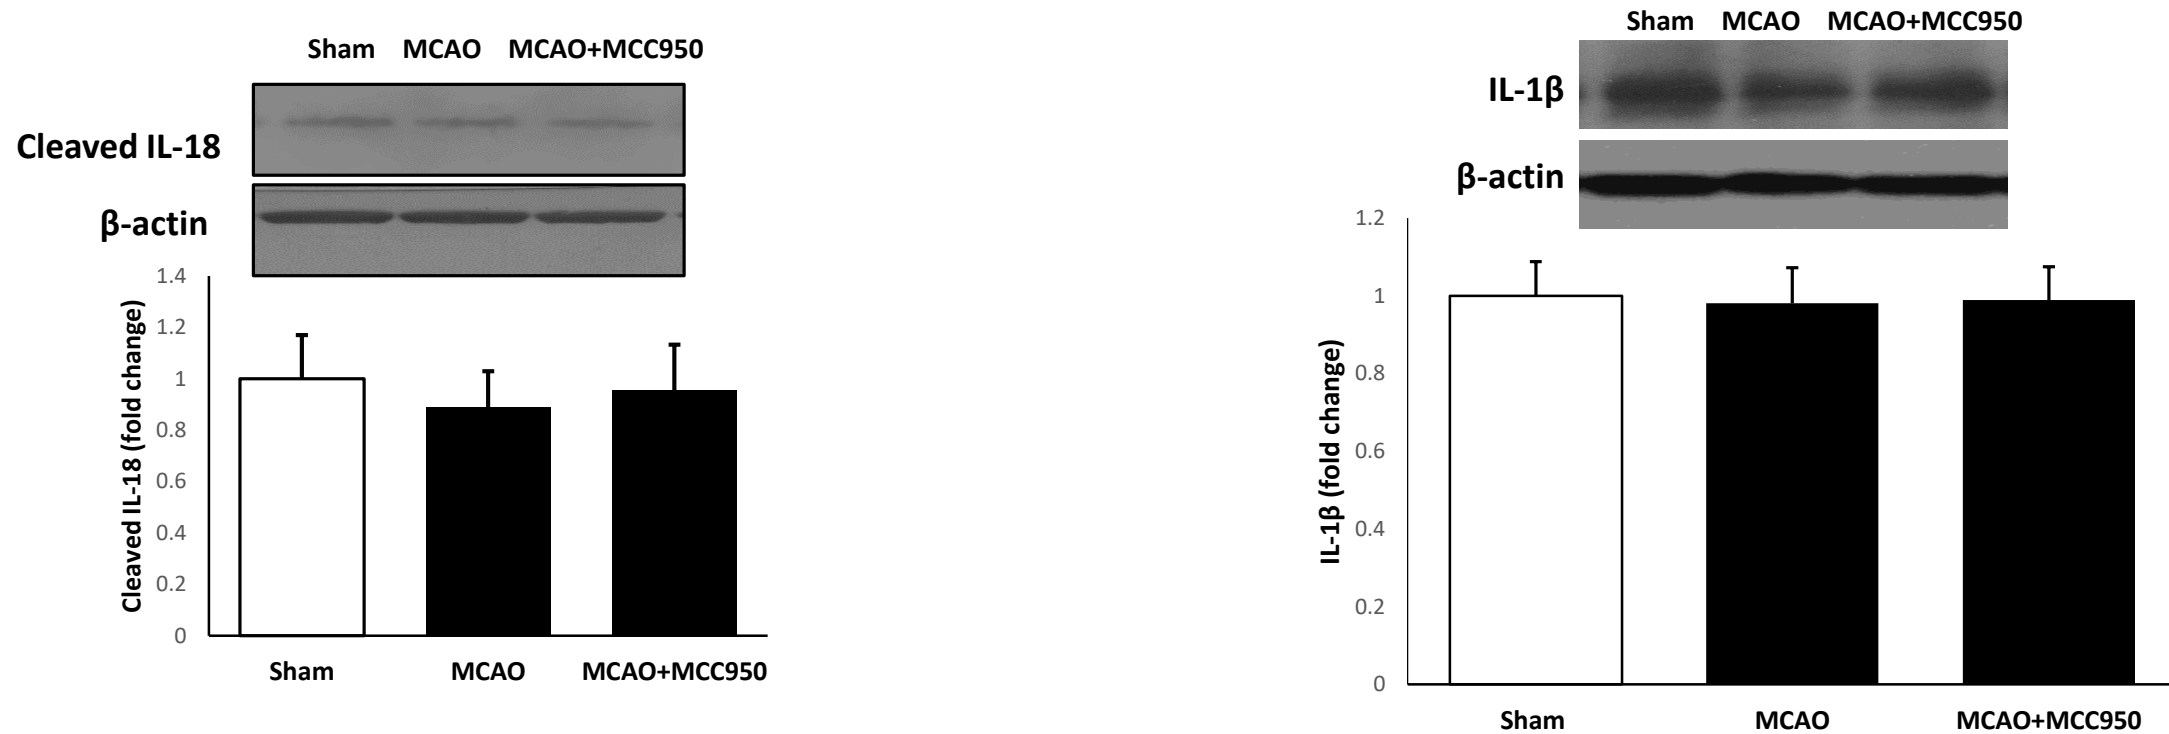

**Figure 1: Expression of Cleaved IL-18 and IL-1 $\beta$  following treatment with MCC950, 24 h post-MCAO.** There was no difference in the expression of IL-1 $\beta$  and IL-18 in response to MCAO and MCC950 treatment

# **Inhibition of the NLRP3-inflammasome as a potential approach for neuroprotection after stroke**

Saifudeen Ismael,<sup>1</sup> Liang Zhao,<sup>1</sup> Sanaz Nasoohi,<sup>1,2</sup> Tauheed Ishrat<sup>1,3\*</sup>

**All Full-length Blots**

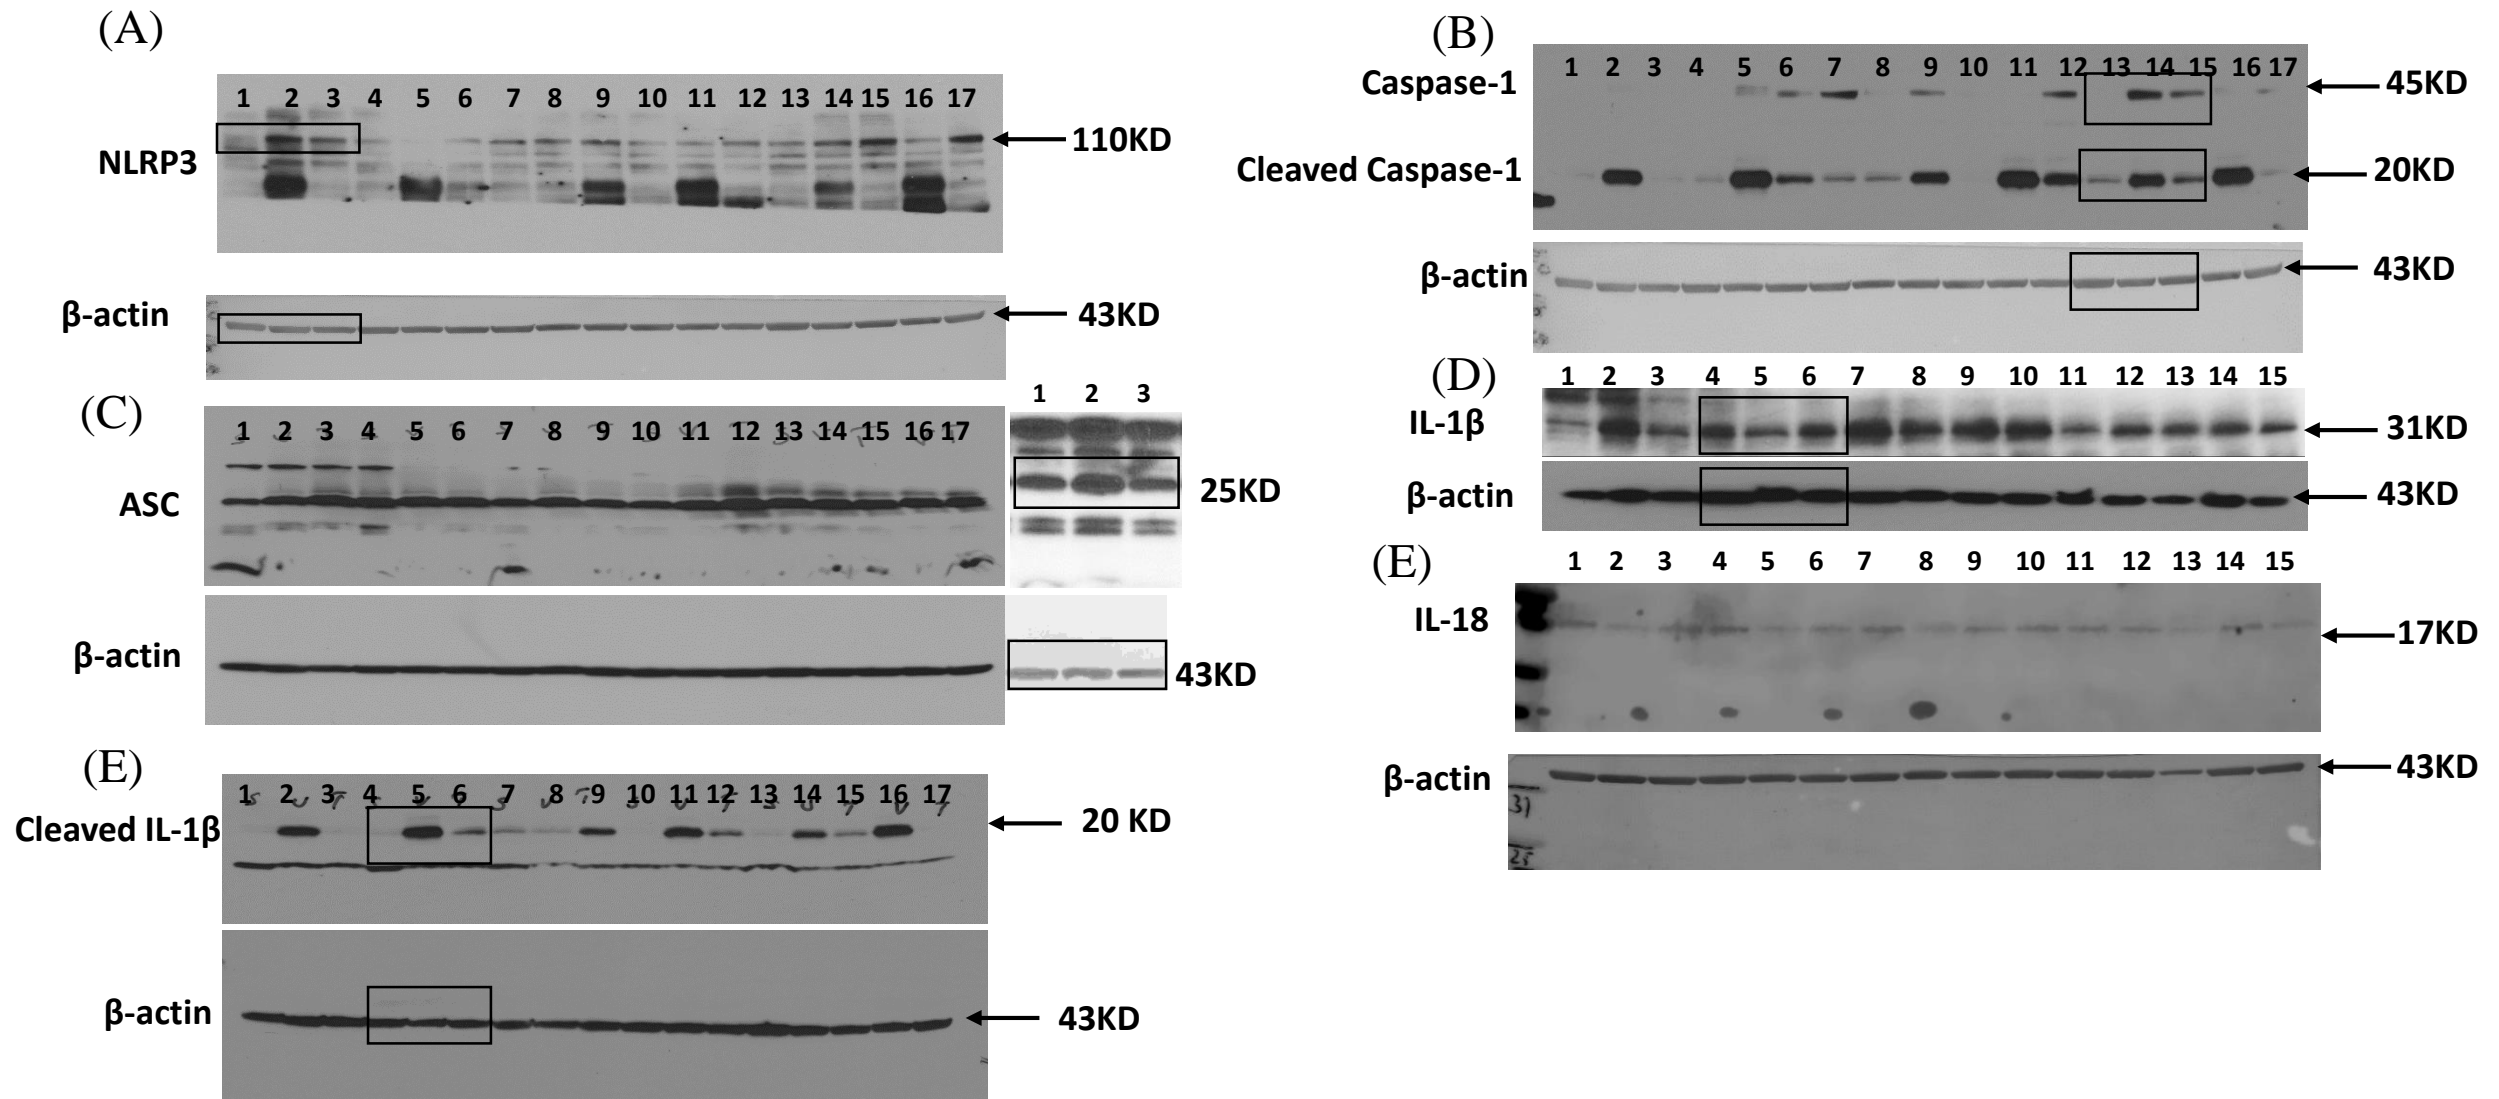

**Figure 2: Expression of NLRP3 inflammasome components(A) NLRP3 (B), Cleaved caspase-1 (C), ASC (D) and IL-1 $\beta$ , following treatment with MCC950, 24 h post-MCAO.**

Sham: 1, 4, 7, 10, 13; TMCAO: 2, 5, 8, 11, 14, 16; TMCAO+MCC950: 3, 6, 9, 12, 15, 17

The representative images used in manuscript are highlighted with box.

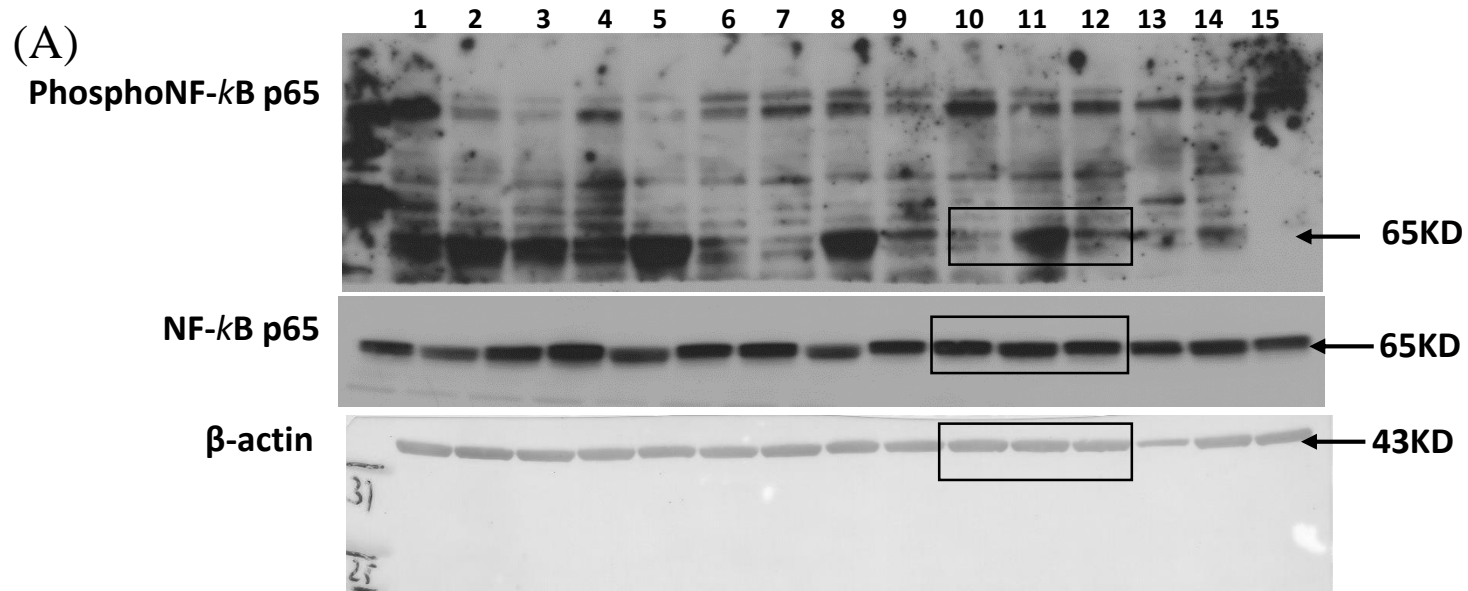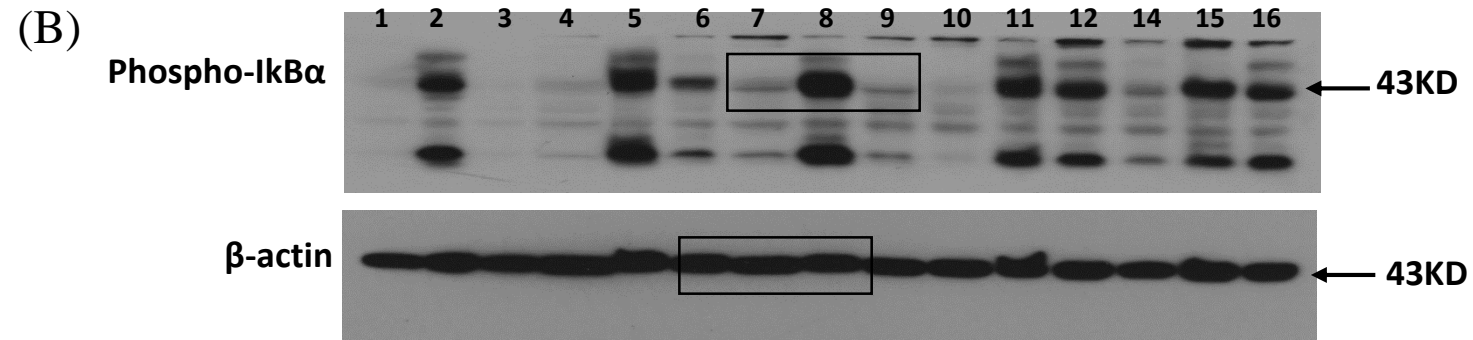

**Figure 3: Expression of phospho-NFkBP65 and NFBp65 (A) phospho-IkB $\alpha$  (B) following treatment with MCC950, 24 h post-MCAO. Sham: 1, 4, 7, 10, 13; TMCAO: 2, 5, 8, 11, 14, 16; TMCAO +MCC950: 3, 6, 9, 12, 15,**

The representative images used in manuscript are highlighted with box.

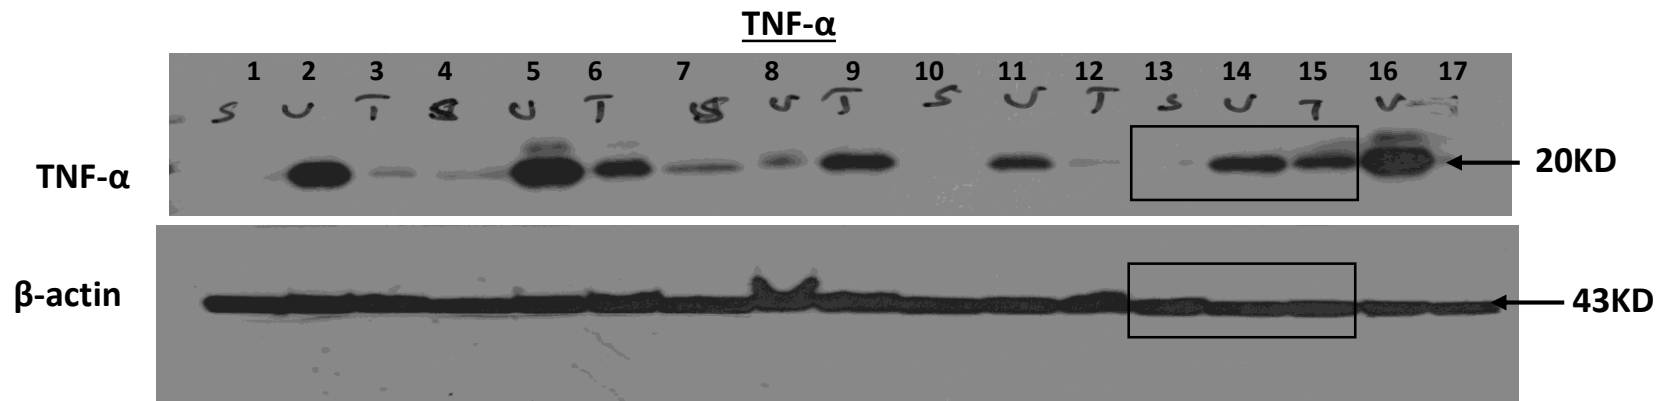

**Figure 4: Expression of TNF $\alpha$ , following treatment with MCC950, 24 h post-MCAO.**

**Sham:** 1, 4, 7, 10, 13; **TMCAO:** 2, 5, 8, 11, 14, 16; **TMCAO+MCC950:** 3, 6, 9, 12, 15, 17

The representative images used in manuscript are highlighted with box.

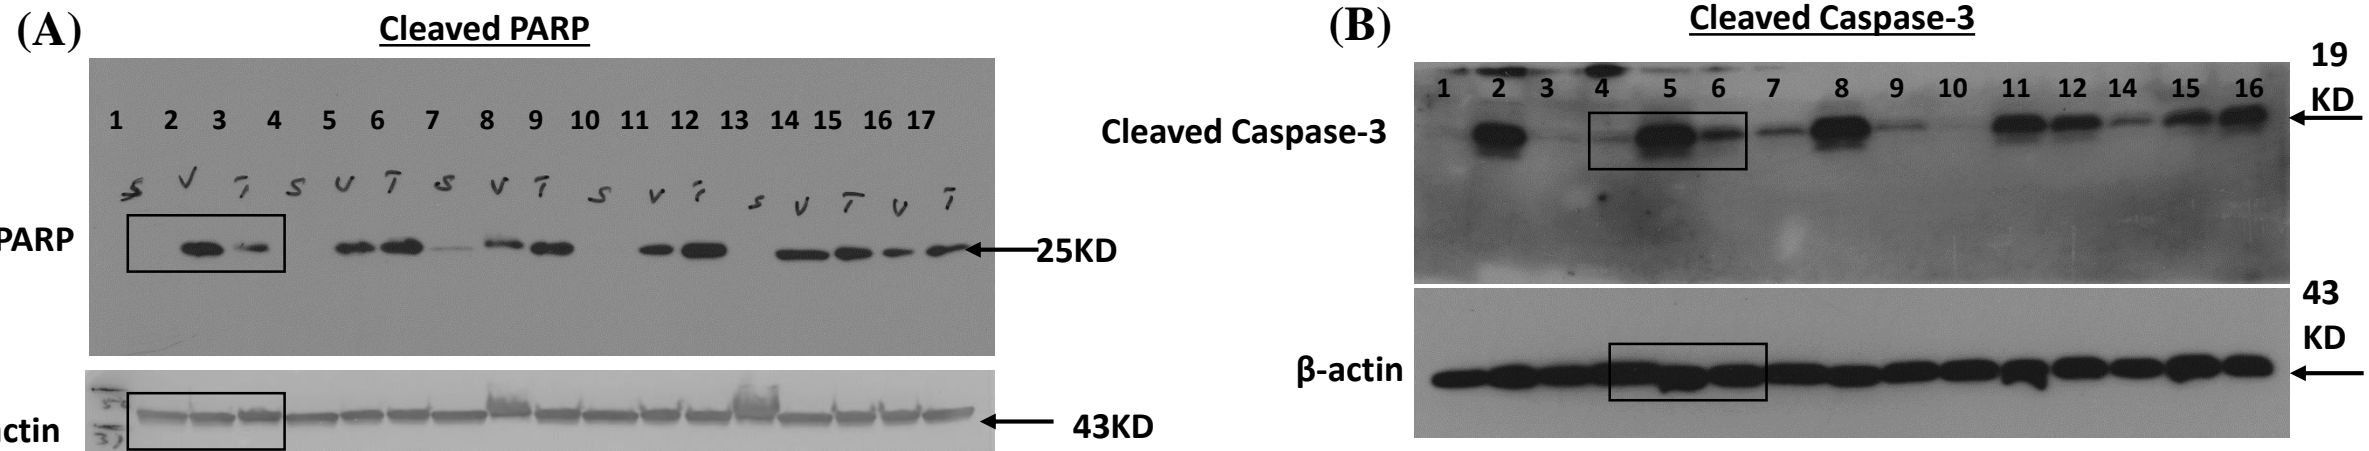

**Figure 5: Expression of (A) Cleaved PARP and (B) Cleaved caspase 3, following treatment with MCC950, 24 h post-MCAO.**

**Sham:** 1, 4, 7, 10, 13; **TMCAO:** 2, 5, 8, 11, 14, 16; **TMCAO+MCC950:** 3, 6, 9, 12, 15, 17

The representative images used in manuscript are highlighted with box.
